# Supplementary material for: Supply of methionine and arginine alters phosphorylation of mechanistic target of rapamycin (mTOR), circadian clock proteins, and α-s1-casein abundance in bovine mammary epithelial cells
Source: Royal Society of Chemistry journal article supplement (doi:10.1039/c9fo02379h), 2020-01-01
Supplement: c9fo02379h1.pdf [file c9fo02379h1.pdf]

**Table S1** Primer sequences used in qRT-PCR

| Gene name      | Reference ID   | Sequence (5' → 3')                                     | Product size (bp) |
|----------------|----------------|--------------------------------------------------------|-------------------|
| <i>GAPDH</i>   | NM_001034034.2 | F: TTGTCTCCTGCGACTTCAACA<br>R: TCGTACCAGGAAATGAGCTTGAC | 103               |
| <i>UXT</i>     | NM_001037471.2 | F: TGTGGCCCTTGGATATGGTT<br>R: GGTTGTCGCTGAGCTCTGTG     | 101               |
| <i>RPS9</i>    | NM_001101152.2 | F: CCTCGACCAAGAGCTGAAG<br>R: CCTCCAGACCTCACGTTTGTTTC   | 64                |
| <i>SLC1A1</i>  | NM_174599.2    | F: GGCTTGCAATCCACTCCATT<br>R: CAGAAGAGCTGGGCCATT       | 101               |
| <i>SLC1A5</i>  | NM_174601.2    | F: CTGGTGAAGGTGCCCACTG<br>R: GAAGAAGCGAATGAGCAGCTC     | 129               |
| <i>SLC3A2</i>  | NM_001024488.2 | F: GTGTGGACGGGTTTCAGGTC<br>R: CCGATCCTCACTGACGCTCT     | 101               |
| <i>SLC7A1</i>  | NM_001135792.1 | F: CTTGACCTGAAGGACCTGG<br>R: GCTCGGGCTGGTATCGTAAG      | 101               |
| <i>SLC7A5</i>  | NM_174613.2    | F: GGGTGACGTAGCCAATCTGG<br>R: ATCCCCATAGGCAAAGAGG      | 107               |
| <i>SLC38A2</i> | NM_001082424   | F: TGAAAAGCCATTATGCCGATGT<br>R: CCCACAATCGCATTGCTCAG   | 148               |
| <i>SLC38A9</i> | NM_001102163   | F: GGGCATAAAACAGGCTGGGT<br>R: CTTGACCACTGCCAAAGGA      | 183               |
| <i>CASTOR1</i> | NM_001081514.1 | F: CTGCACATCCTAGAGCACCG<br>R: AAGAACTTGCACCGGCTTCG     | 119               |
| <i>MIOS</i>    | NM_001192318.1 | F: CTTCCGAGGCCGAGATGAG<br>R: TCAGAGAGTCCAGTTAGGTCCA    | 140               |
| <i>DEPDC5</i>  | XM_005218191.4 | F: GACTCTGGGGGCGTAGGAG<br>R: TCATCTTGCCTCCCCGCA        | 118               |
| <i>RRAGA</i>   | NM_001035499.1 | F: CTTGCGCTTCCCAGCTGTA<br>R: CTGTATTTGGCATCACCCGC      | 147               |
| <i>WDR24</i>   | NM_001045973.2 | F: TGGATACAGCCGAGCGTTAC<br>R: CGTCTGAGCCACCTGGTTAC     | 107               |
| <i>TAS1R3</i>  | XM_015466888.1 | F: AATGTGGACCTTGCTTATG<br>R: AGATCATGCTGGAGAACT        | 115               |
| <i>PIK3C3</i>  | NM_001099067.1 | F: GCCAAGCATTGTTGAAGGGT<br>R: GCACCAGCCGATCTACAAAAG    | 87                |
| <i>SIRT1</i>   | NM_001192980.3 | F: TCATGGTTCCTTTGCAACAGC<br>R: AGGACATCGAGGAACCACCTG   | 103               |
| <i>NAMPT</i>   | NM_001244141.1 | F: TTCTGGTGGAGCCTTGCTAC<br>R: GAAGACGTTAATCCCAAGGCCA   | 100               |
| <i>STK11</i>   | DN517838       | F: GCCCCTCTTTTGAAGCTT<br>R: TTATCCGCAAGATGTCTGCG       | 151               |

**Table S2** RT-PCR performance

| Gene           | Median Ct | Median $\Delta$ Ct | Slope | R <sup>2</sup> | Efficiency |
|----------------|-----------|--------------------|-------|----------------|------------|
| <i>GAPDH</i>   | 17.945    |                    | -3.29 | 0.999          | 2.012      |
| <i>UTX</i>     | 23.081    |                    | -3.30 | 0.997          | 2.009      |
| <i>RPS9</i>    | 18.782    |                    | -3.23 | 0.999          | 2.038      |
| <i>SLC1A1</i>  | 22.911    | 3.088              | -3.36 | 0.999          | 1.986      |
| <i>SLC1A5</i>  | 21.738    | 1.940              | -3.24 | 0.996          | 2.036      |
| <i>SLC3A2</i>  | 22.356    | 2.482              | -3.32 | 0.995          | 2.000      |
| <i>SLC7A1</i>  | 23.452    | 3.648              | -3.26 | 0.994          | 2.026      |
| <i>SLC7A5</i>  | 23.053    | 3.261              | -3.28 | 0.994          | 2.016      |
| <i>SLC38A2</i> | 19.990    | 0.146              | -3.25 | 0.999          | 2.030      |
| <i>SLC38A9</i> | 23.957    | 4.106              | -3.24 | 0.998          | 2.035      |
| <i>CASTOR1</i> | 32.786    | 13.032             | -3.38 | 0.997          | 1.977      |
| <i>MIOS</i>    | 27.968    | 8.191              | -3.46 | 0.992          | 1.945      |
| <i>DEPDC5</i>  | 26.975    | 7.164              | -3.19 | 0.999          | 2.058      |
| <i>RRAGA</i>   | 22.129    | 2.328              | -3.32 | 0.996          | 2.001      |
| <i>WDR24</i>   | 25.060    | 5.292              | -3.28 | 0.999          | 2.018      |
| <i>TAS1R3</i>  | 31.379    | 11.514             | -3.11 | 0.997          | 2.097      |
| <i>PIK3C3</i>  | 24.788    | 4.952              | -3.17 | 0.992          | 2.070      |
| <i>SIRT1</i>   | 25.510    | 5.711              | -3.22 | 0.996          | 2.046      |
| <i>NAMPT</i>   | 23.749    | 3.913              | -3.05 | 0.998          | 2.128      |
| <i>STK11</i>   | 24.616    | 4.809              | -3.22 | 0.992          | 2.043      |

**Table S3** Antibodies used for western blotting

| Antibody                                       | Cat. No.      | Source                  | Molecular Weight (kDa) | Dilution |
|------------------------------------------------|---------------|-------------------------|------------------------|----------|
| CASTOR1                                        | ARP70446_P050 | Avivasysbio.            | 36                     | 1:125    |
| MIOS                                           | ab202274      | Abcam                   | 99                     | 1:1000   |
| NPRL3                                          | ab229735      | Abcam                   | 64                     | 1:500    |
| RRAGA                                          | ab91062       | Abcam                   | 35                     | 1:250    |
| PIK3C3                                         | ab227861      | Abcam                   | 120                    | 1:500    |
| $\alpha$ s1-casein                             | ab166596      | Abcam                   | 22                     | 1:200    |
| ERK                                            | OASE00362     | Aviva Syst. Biol.       | 44, 42                 | 1:1000   |
| p-ERK(Thr <sup>202</sup> /Tyr <sup>204</sup> ) | 4370T         | Cell Signaling Technol. | 44, 42                 | 1:1000   |
| Akt                                            | 9272S         | Cell Signaling Technol. | 60                     | 1:1000   |
| p-Akt(Ser <sup>473</sup> )                     | 9271S         | Cell Signaling Technol. | 60                     | 1:250    |
| AMPK                                           | 5831S         | Cell Signaling Technol. | 62                     | 1:1000   |
| p-AMPK(Thr <sup>172</sup> )                    | 2535          | Cell Signaling Technol. | 62                     | 1:250    |
| TSC2                                           | 4308          | Cell Signaling Technol. | 200                    | 1:500    |
| p-TSC2(Thr <sup>1462</sup> )                   | 3617S         | Cell Signaling Technol. | 200                    | 1:250    |
| mTOR                                           | 2972S         | Cell Signaling Technol. | 289                    | 1:1000   |
| p-mTOR(Ser <sup>2448</sup> )                   | 2971S         | Cell Signaling Technol. | 289                    | 1:1000   |
| CLOCK                                          | ARP33730_P050 | Aviva Syst. Biol.       | 95                     | 1:500    |
| ARNT1                                          | ab93806       | Abcam                   | 69                     | 1:250    |
| CRY1                                           | ab229631      | Abcam                   | 66                     | 1:250    |
| PER1                                           | SC398890      | Santa Cruz Biotechnol.  | 136                    | 1:200    |
| PER2                                           | 20359-1-AP    | Proteintech             | 136                    | 1:100    |
| GAPDH                                          | 2118S         | Cell Signaling Technol. | 37                     | 1:1000   |
| Anti-rabbit IgG                                | 7074          | Cell Signaling Technol. |                        | 1:1500   |
| m-IgGk BP-HRP                                  | SC516102      | Santa Cruz Biotechnol.  |                        | 1:1500   |

**Table S4** Description of amino acid transporters evaluated

| AA transporter        | Name                              | Function                                                |
|-----------------------|-----------------------------------|---------------------------------------------------------|
| <i>SCL1A1 (EAAT3)</i> | solute carrier family 1 member 1  | Glutamate transporter                                   |
| <i>SLC1A5 (ASCT2)</i> | solute carrier family 1 member 5  | Neutral amino acid transporter                          |
| <i>SCL3A2 (4F2hc)</i> | solute carrier family 3 member 2  | Heavy-chain amino acid transporter                      |
| <i>SLC7A1 (CAT1)</i>  | solute carrier family 7 member 1  | High affinity cationic amino acid transporter           |
| <i>SCL7A5 (LAT1)</i>  | solute carrier family 7 member 5  | Branched-chain and aromatic amino acid transporter      |
| <i>SCL38A2</i>        | solute carrier family 38 member 2 | Na <sup>+</sup> -coupled neutral amino acid transporter |
| <i>SCL38A9</i>        | solute carrier family 38 member 9 | Na <sup>+</sup> -coupled neutral amino acid transporter |

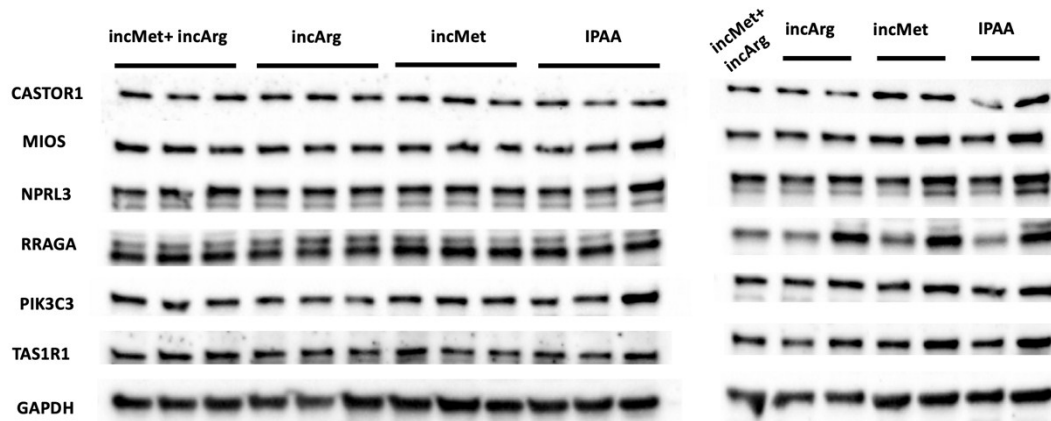

**Figure S1** Representative western blots<sup>1</sup> of regulators of the mTORC1 pathway

<sup>1</sup> Five replicates per treatment were subjected to two 10% SDS/PAGE gels.

The intensity of GAPDH was used to normalize target protein abundance.

IPAA = ideal profile of AA, Lys:Met 2.9:1, Lys:Arg 2:1; incArg = increased supply of Arg, Lys:Met 2.9:1, Lys:Arg 1:1; incMet = increased supply of Met, Lys:Met 2.5:1, Lys:Arg 2:1; incMet+ incArg = increased supply both of Met and Arg, Lys:Met 2.5:1, Lys:Arg 1:1.

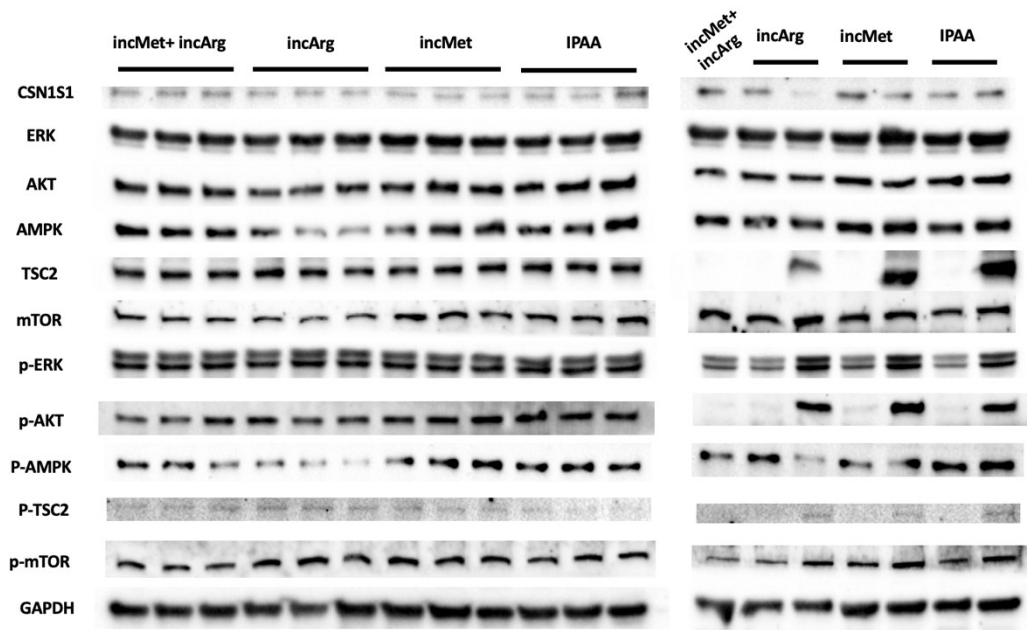

**Figure S2** Representative western blot<sup>1</sup> of  $\alpha$ -s1-casein and components in mTORC1 related pathways

<sup>1</sup> Five replicates per treatment were subjected to two 10% SDS/PAGE gels.

The intensity of GAPDH was used to normalize target protein abundance.

IPAA = ideal profile of AA, Lys:Met 2.9:1, Lys:Arg 2:1; incArg = increased supply of Arg, Lys:Met 2.9:1, Lys:Arg 1:1; incMet = increased supply of Met, Lys:Met 2.5:1, Lys:Arg 2:1; incMet+ incArg = increased supply both of Met and Arg,

Lys:Met
2.5:1,
Lys:Arg
1:1.

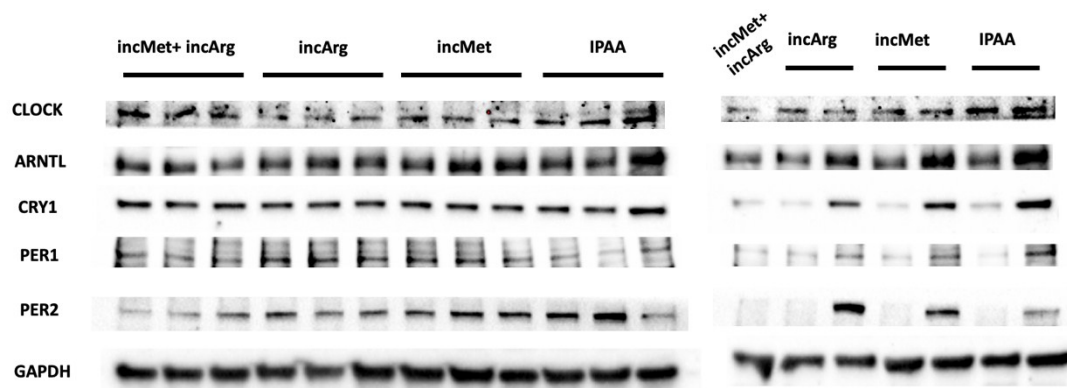

**Figure S3 Representative western blot of circadian clock proteins**

<sup>1</sup>Five replicates per treatment were subjected to two 10% SDS/PAGE gels.

The intensity of GAPDH was used to normalize target protein abundance.

IPAA = ideal profile of AA, Lys:Met 2.9:1, Lys:Arg 2:1; incArg = increased supply of Arg, Lys:Met 2.9:1, Lys:Arg 1:1; incMet = increased supply of Met, Lys:Met 2.5:1, Lys:Arg 2:1; incMet+ incArg = increased supply both of Met and Arg, Lys:Met 2.5:1, Lys:Arg 1:1.
